# Supplementary material
Source: publisher figshare collection journal article supplement (https://tandf.figshare.com/articles/dataset/_/5630116)
Supplement: Supplementary file 2 [file 1]

Archive with 2 entries (2 files):
- Supplementary_figure_A_DBCG2018_Ms21.pdf
- Supplementary_figure_B_DBCG2018_Ms21.pdf
