# Supplementary material
Source: publisher figshare collection journal article supplement (https://tandf.figshare.com/articles/dataset/_/5630116)
Supplement: Supplementary file 2 [file 1 › Supplementary_figure_B_DBCG2018_Ms21.pdf]

**Supplementary figure B.** Adjuvant treatment regimens according to clinical and pathological response after neoadjuvant letrozole

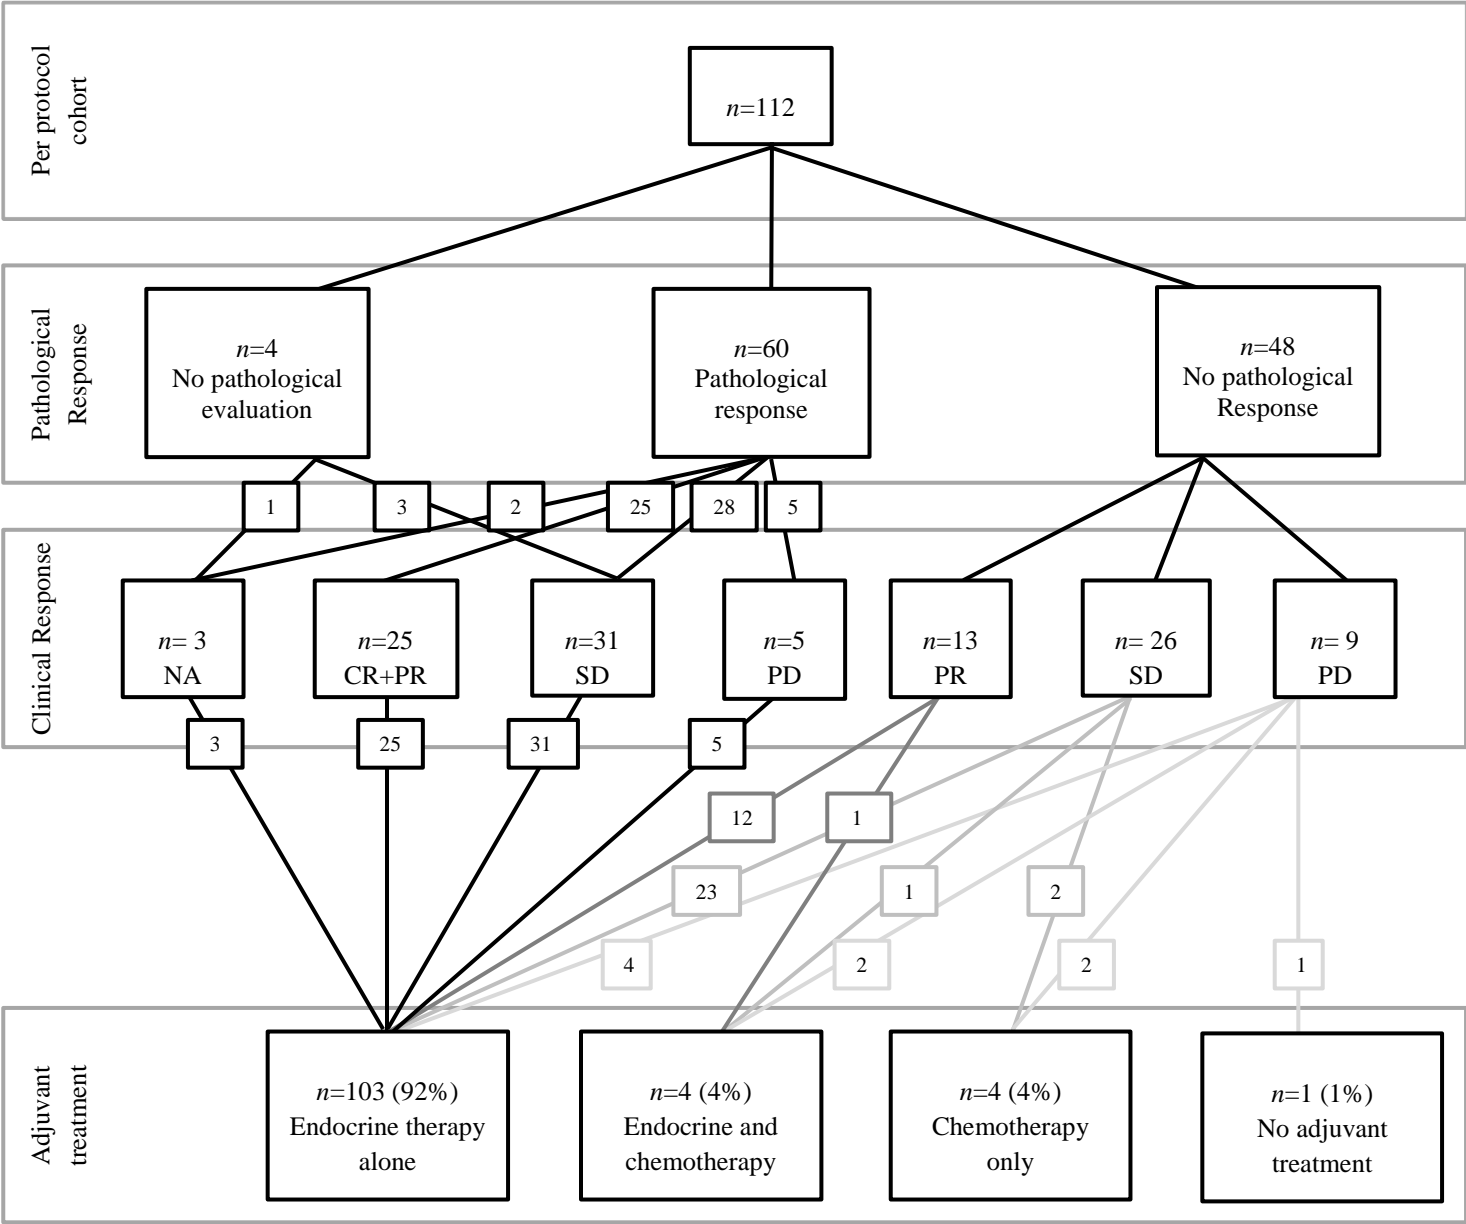

n = 112. CR = Complete response, PR = Partial response, SD = Stable disease, PD = Progressive disease, NA = not available
