# Supplementary material
Source: publisher figshare collection journal article supplement (https://tandf.figshare.com/articles/dataset/_/5630116)

**Supplementary figure A.** Flow diagram of the study population

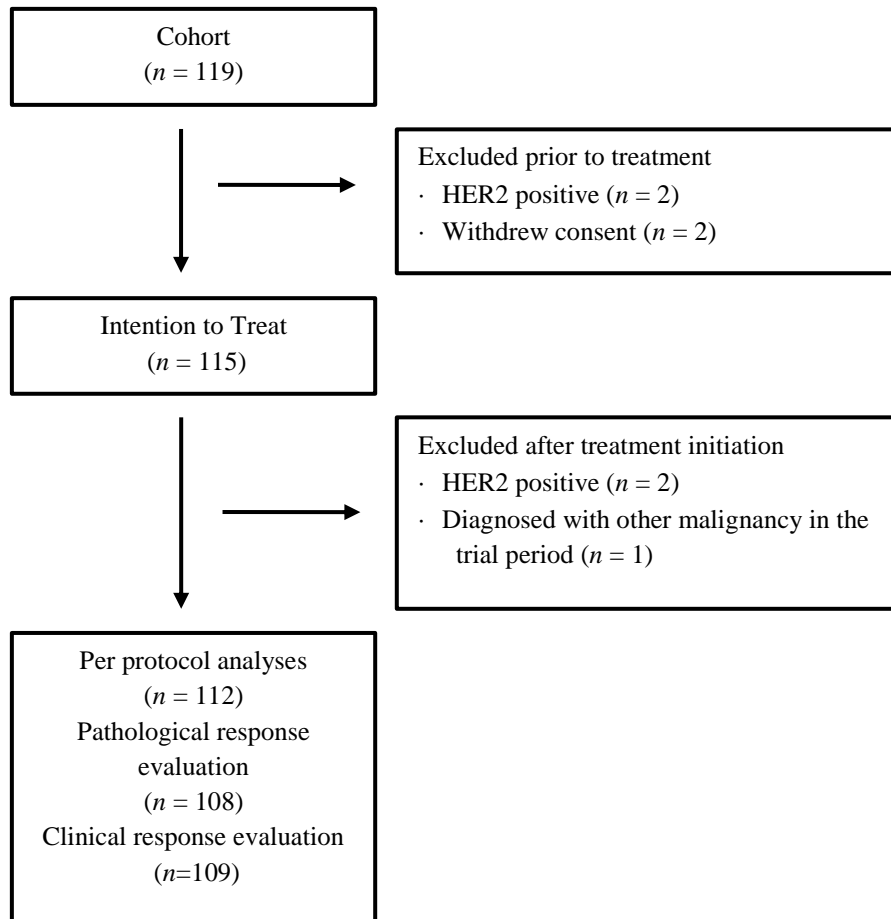

Supplement: Supplementary file 1 [file 1]
